# Supplementary material
Source: PubMed Central journal article supplement (PMC4339674)
Supplement: NIHMS625515-supplement-01.pdf [file NIHMS625515-supplement-01.pdf]

**Supplementary figure legends:**

Figure 1: Overarching title: Screenshots illustrating the views the subject had while performing the simulation

Figure 1A: Normal driving simulation shows car in the correct (right) side of the road

Figure 1B: Driving simulation showing lane deviation outside the road

Figure 1C: Driving simulation showing lane deviation onto the wrong lane (left) side of the road.

Figure 2: Correlation between apnea-hypopnea index and sleep parameters

Figure 2A: Correlation of AHI with Epworth Sleepiness Scale

Figure 2B: Correlation of AHI with Pittsburgh Sleep Quality Index

Suppl. Figure 1A: Normal car position during simulation

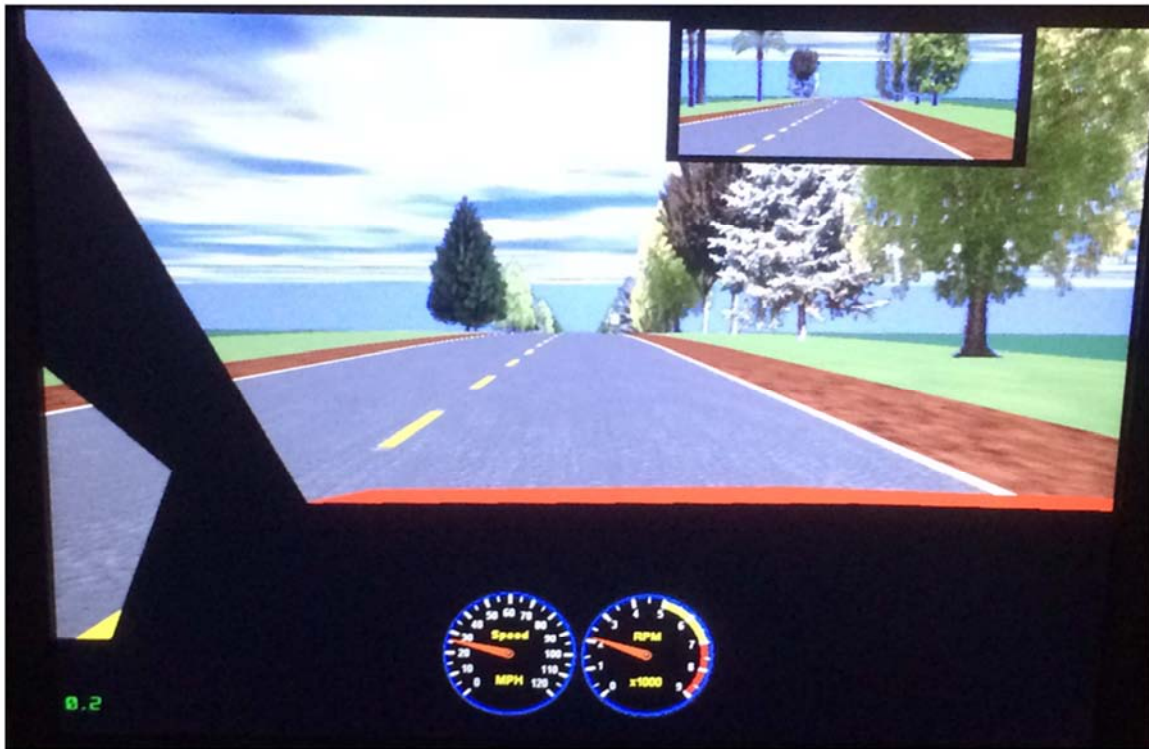

Suppl. Figure 1B: Lane deviation onto the opposite lane

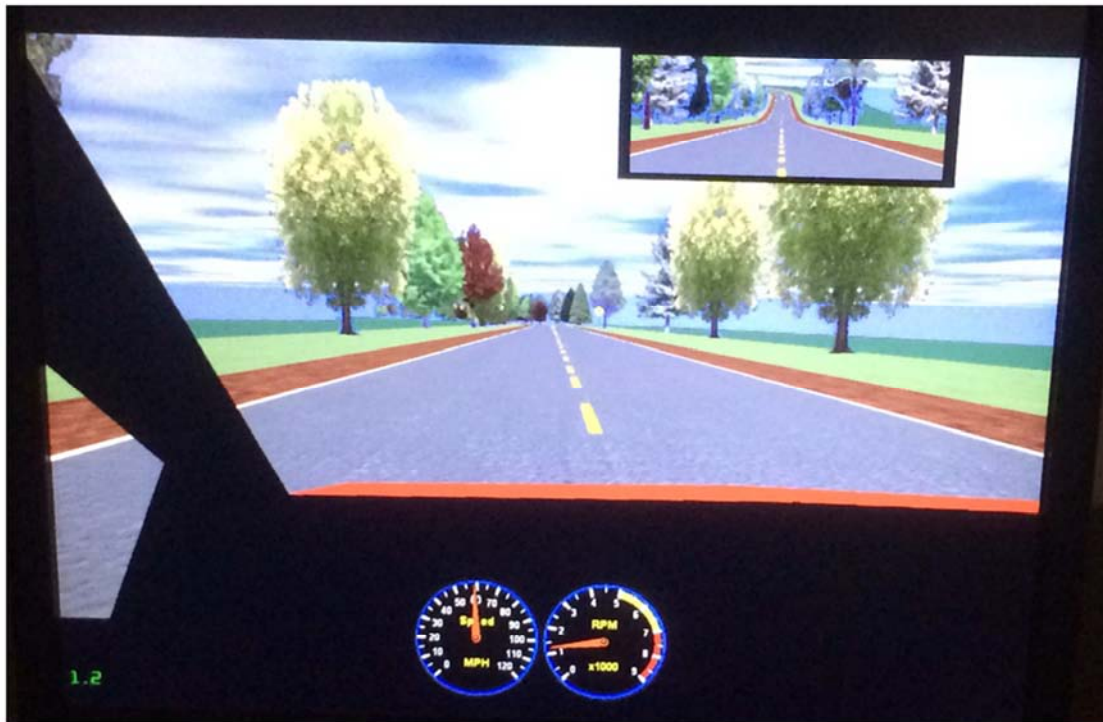

Suppl. Figure 1C: Lane deviation off the road

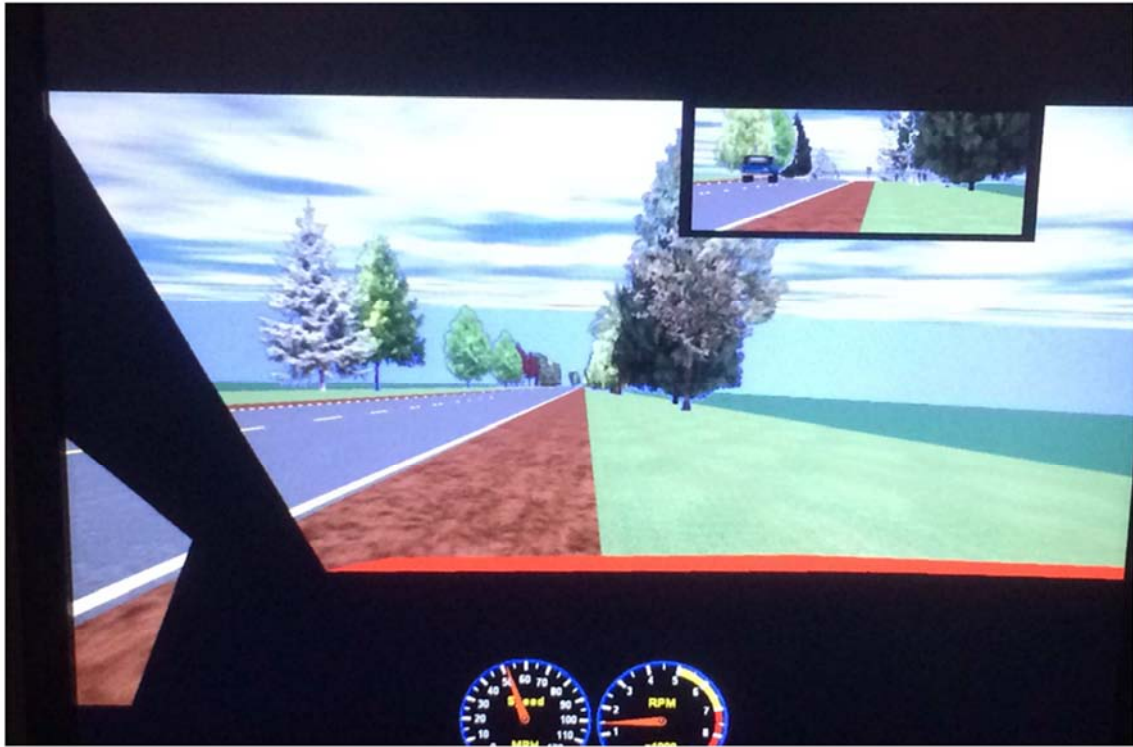

ACCEPTED MANUSCRIPT

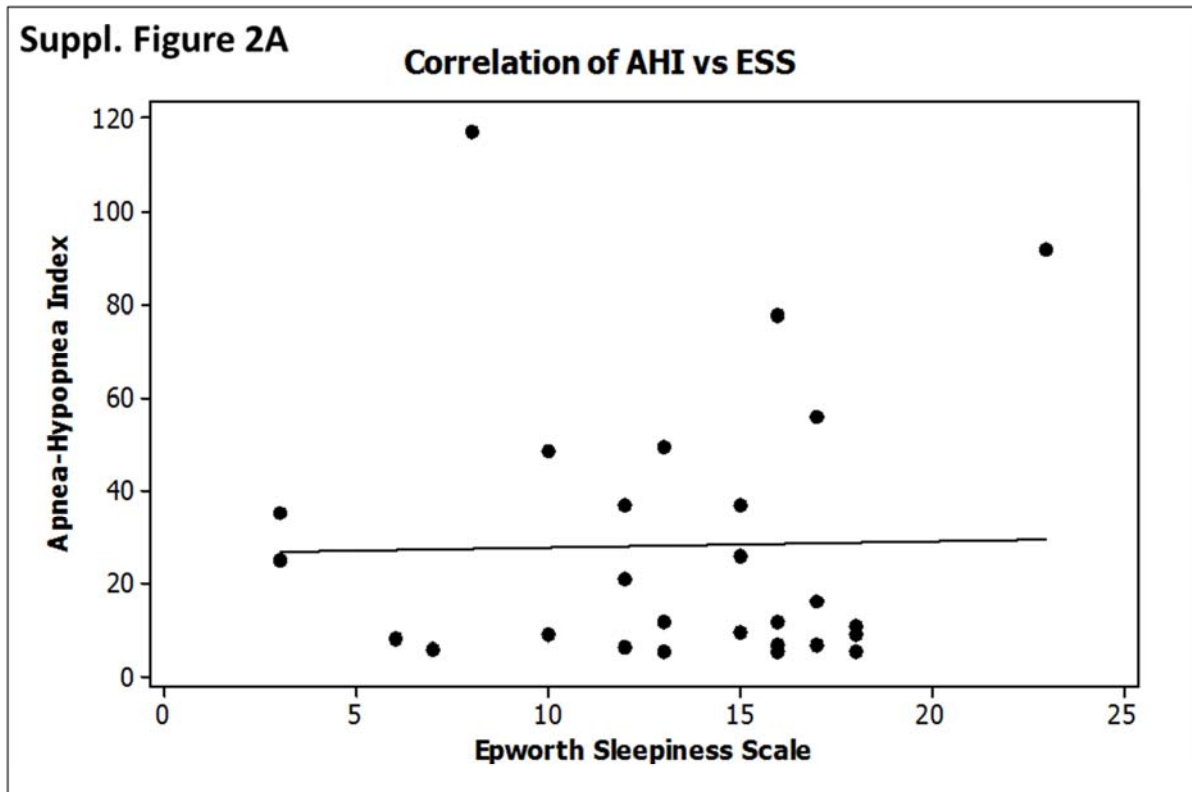



Suppl. Figure 2B

## Correlation of AHI vs PSQI

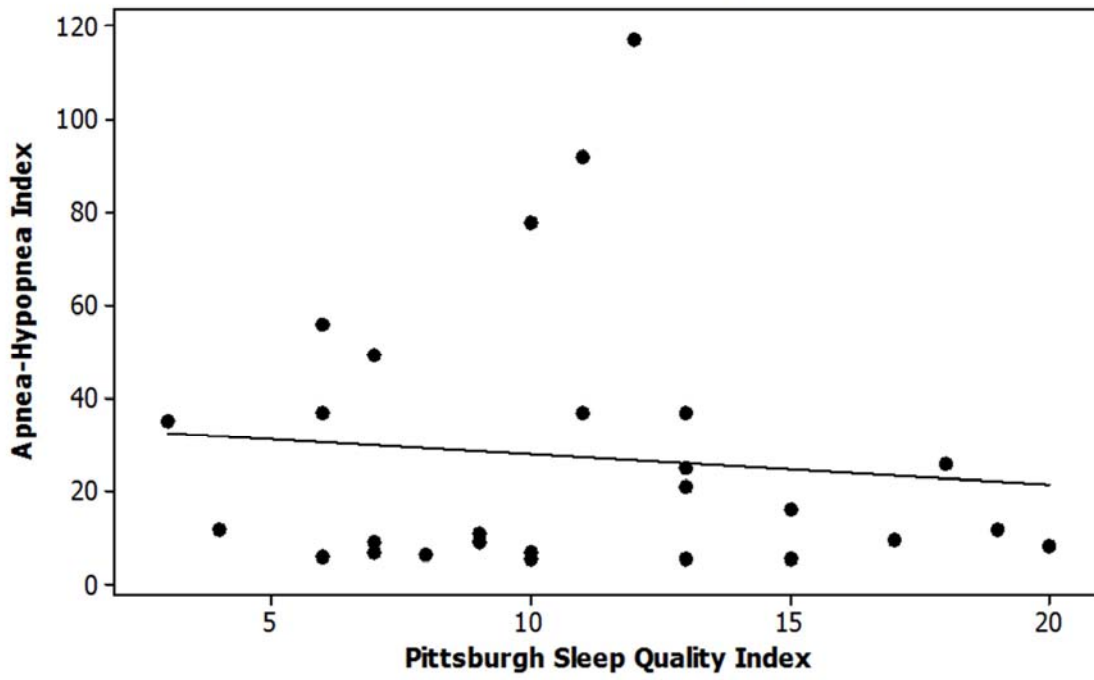

ACCEPTED MANUSCRIPT
